# Supplementary material for: Unmodified mRNA in LNPs constitutes a competitive technology for prophylactic vaccines
Source: PubMed Central journal article supplement (PMC5648897; doi:10.1038/s41541-017-0032-6), 2017-10-19
Supplement: 41541_2017_32_MOESM1_ESM.pdf [file 41541_2017_32_MOESM1_ESM.pdf]

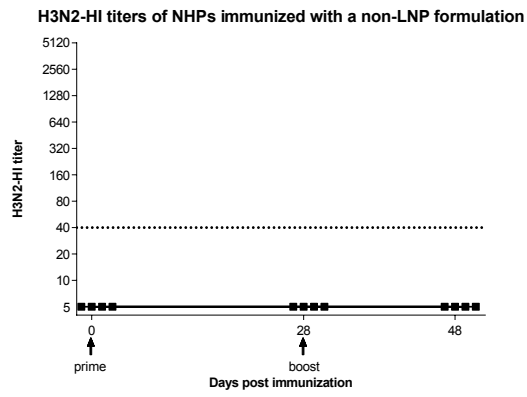

**Supplementary Figure 1.** Explorative H3N2-HA mRNA/non-LNP vaccine does not induce humoral responses in NHPs. The NHPs shown in Figure 4D ( $n = 2m, 2f$  per group), which have been initially vaccinated with  $10 \mu\text{g}$  H1N1-HA mRNA/LNP, were vaccinated i.m. with  $100 \mu\text{g}$  of an explorative H3N2-HA mRNA/non-LNP vaccine as indicated in Figure 4D. H3N2-HI titers were measured before and after prime vaccination with the H3N2-HA mRNA/non-LNP formulation. Values from individual animals (dots) are reported for each group. Dashed line indicates the conventionally defined protective titer of 1:40 for HI.
