# Supplementary material for: Unmodified mRNA in LNPs constitutes a competitive technology for prophylactic vaccines
Source: PubMed Central journal article supplement (PMC5648897; doi:10.1038/s41541-017-0032-6), 2017-10-19
Supplement: 41541_2017_32_MOESM2_ESM.pdf [file 41541_2017_32_MOESM2_ESM.pdf]

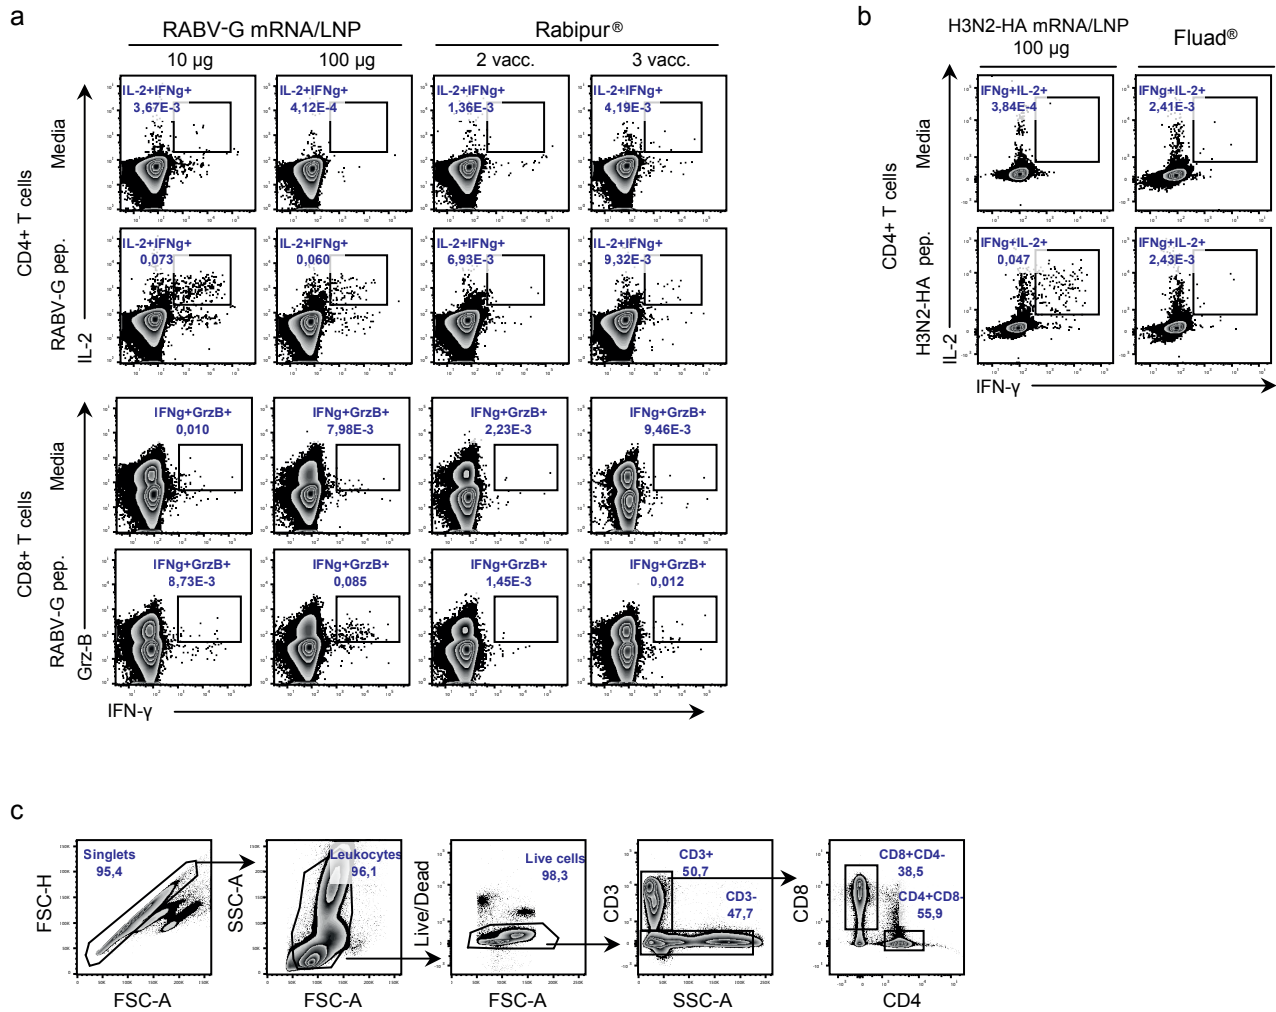

**Supplementary Figure 2.** Gating strategy for the detection of RABV-G- and H3N2-HA-specific T cells in vaccinated NHPs described in Figure 5. Representative dot plots are shown for each group (full data set in Fig. 5). (a) PBMCs of rabies-vaccinated animals were stimulated with either an overlapping peptide library covering the RABV-G protein (RABV-G pep.) or unstimulated (media), gated into CD8<sup>+</sup> and CD4<sup>+</sup> T cell populations as shown below and analyzed by intracellular cytokine staining using anti-IL-2, anti-IFN- $\gamma$ , and anti-Granzyme B (Grz-B) antibodies. (b) PBMCs of influenza-vaccinated animals were stimulated with either an overlapping peptide library covering the H3N2-HA protein (H3N2-HA pep.) or unstimulated (media) and analyzed as in (a). (c) Gating of single, live, CD3<sup>+</sup> lymphocytes into CD8<sup>+</sup> and CD4<sup>+</sup> T cell populations as used in (a) and (b).
